# Supplementary material for: Technical note: A flexible framework for precision reduction of WRF inputs and outputs to balance storage efficiency and scientific fidelity
Source: Copernicus journal article supplement (doi:10.5194/acp-26-7261-2026), 2026-05-27
Supplement: Supplementary file [file acp-26-7261-2026-supplement.pdf]

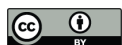

*Supplement of*

**Technical note: A flexible framework for precision reduction of WRF inputs and outputs to balance storage efficiency and scientific fidelity**

**Shang Wu et al.**

*Correspondence to:* David C. Wong (wong.david-c@epa.gov) and Jiandong Wang (jiandong.wang@nuist.edu.cn)

The copyright of individual parts of the supplement might differ from the article licence.

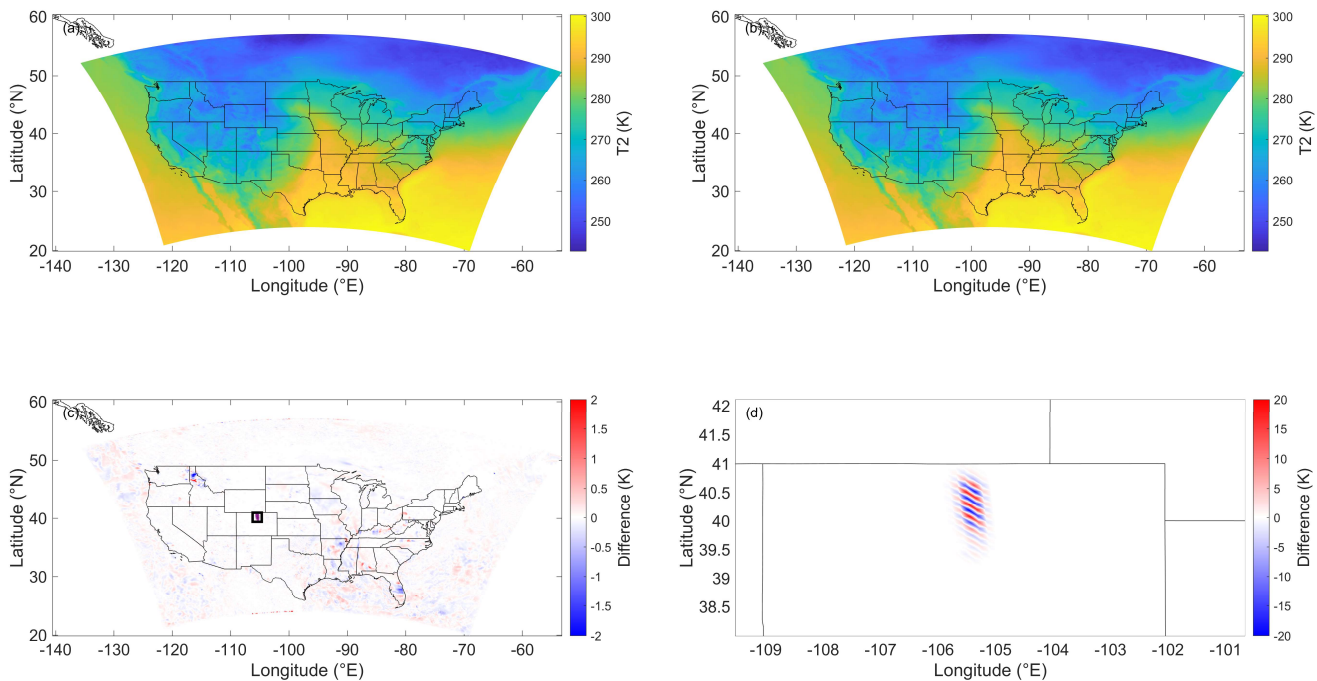

**Figure S1: Spatial visualization of T2 at the time step exhibiting the maximum AD. (a) WRF\_bl, (b) WRF\_3, (c) the spatial difference fields (WRF\_3 minus WRF\_bl), and (d) a locally zoomed-in view of the difference field corresponding to the bold black box in (c). The black square marks the precise location of the maximum AD (21.12 K). At this specific time step, the domain-wide SSIM is 0.998.**

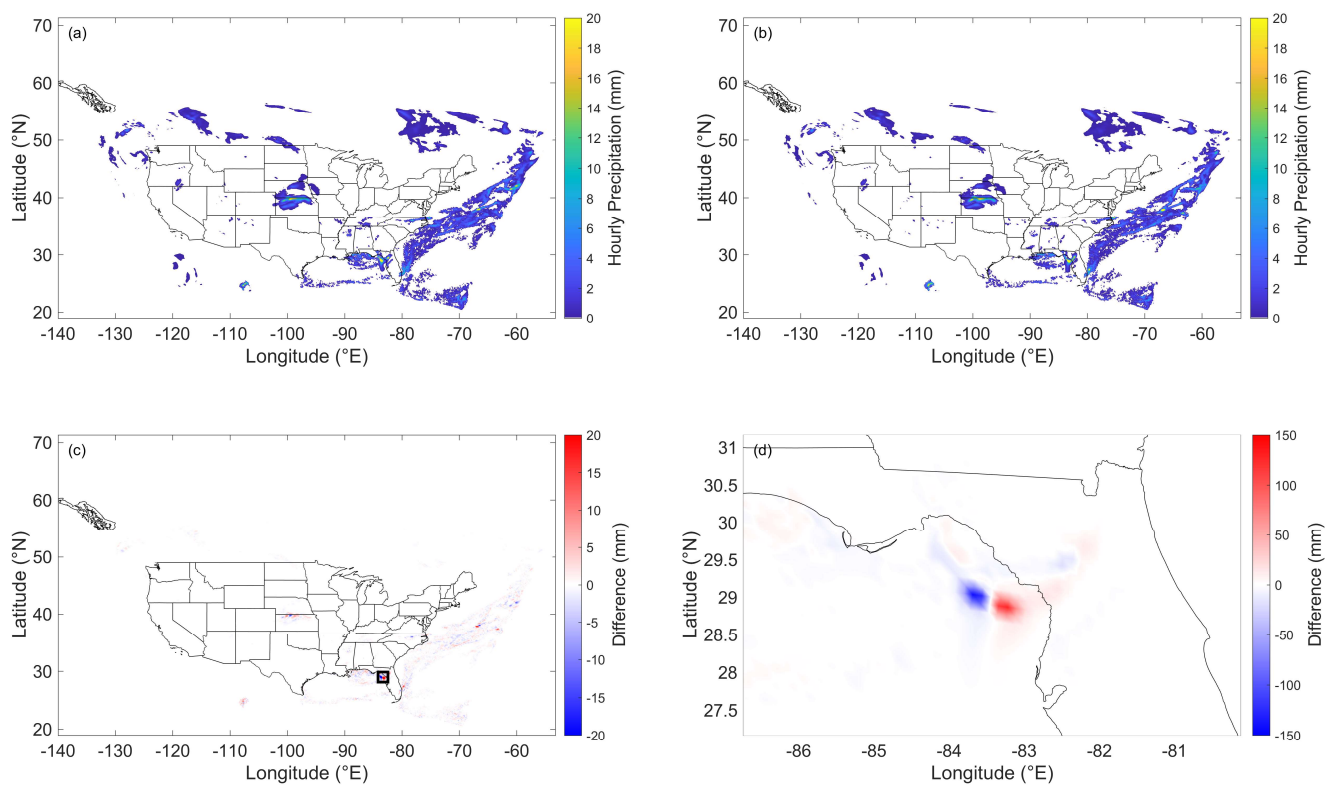

**Figure S2: Spatial visualization of hourly precipitation at the time step exhibiting the maximum AD. (a) WRF\_bl, (b) WRF\_3, (c) the spatial difference fields (WRF\_3 minus WRF\_bl), and (d) a locally zoomed-in view of the difference field corresponding to the bold black box in (c). The black square in panel (c) pinpoints the exact location of the maximum AD (145.45 mm). At this specific time step, the domain-wide SSIM is 0.986.**

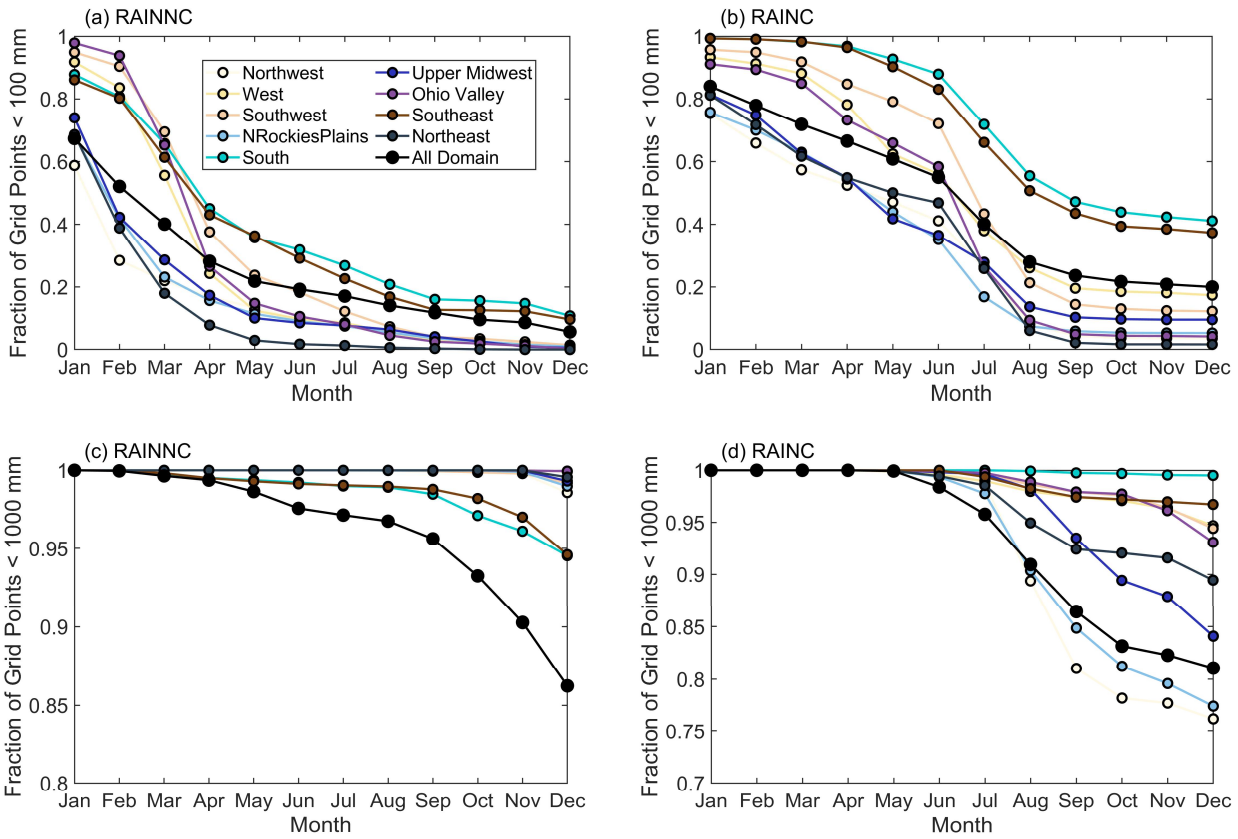

**Figure S3: Monthly evolution of the fraction of grid points with accumulated non-convective (RAINNC; a, c) and convective (RAINNC; b, d) precipitation remaining below the 100 mm (top row) and 1000 mm (bottom row) thresholds. The lines denote different climate regions and the entire WRF simulation domain average.**

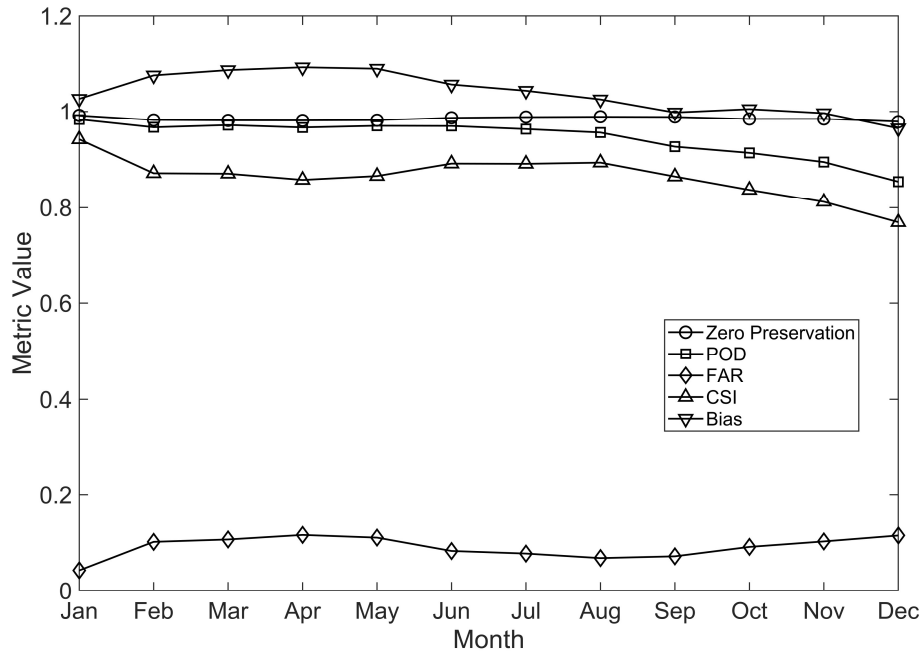

**Figure S4: temporal evolution of precipitation occurrence metrics under the WRF\_fx4 configuration.**

**Table S1. Supplementary statistical summaries of grid-scale AD and domain-scale SSIM relative to WRF\_bl.**

| Variable                            | Precision Configuration | Mean AD   | Maximum AD | Mean SSIM | Minimum SSIM | 1th Percentile SSIM |
|-------------------------------------|-------------------------|-----------|------------|-----------|--------------|---------------------|
| T2 (K)                              | WRF_5fx5                | 0.0585092 | 14.24808   | 0.9941464 | 0.9638181    | 0.9714917           |
|                                     | WRF_4fx5                | 0.0596670 | 21.44217   | 0.9941094 | 0.9631336    | 0.9711497           |
|                                     | WRF_3fx5                | 0.0895583 | 21.11215   | 0.9923728 | 0.9609654    | 0.9688216           |
|                                     | WRF_5fx4                | 0.0698946 | 14.28809   | 0.9935838 | 0.9624803    | 0.9705521           |
|                                     | WRF_4fx4                | 0.0704955 | 21.43216   | 0.9935364 | 0.9620183    | 0.9701092           |
|                                     | WRF_3fx4                | 0.0954634 | 21.13217   | 0.9917775 | 0.9599726    | 0.9677429           |
|                                     | WRF_5fx3                | 0.2695719 | 13.88809   | 0.9653397 | 0.9223217    | 0.9361422           |
|                                     | WRF_4fx3                | 0.2697850 | 21.03217   | 0.9652849 | 0.9204355    | 0.9355961           |
| Q2 (kg kg <sup>-1</sup> )           | WRF_3fx3                | 0.2765166 | 21.03217   | 0.9634103 | 0.9183630    | 0.9325463           |
|                                     | WRF_5fx5                | 0.0000477 | 0.0134958  | 0.9898865 | 0.9457601    | 0.9574135           |
|                                     | WRF_4fx5                | 0.0000485 | 0.0125344  | 0.9897912 | 0.9471013    | 0.9578403           |
|                                     | WRF_3fx5                | 0.0000677 | 0.0120282  | 0.9853347 | 0.9410694    | 0.9523994           |
|                                     | WRF_5fx4                | 0.0000478 | 0.0134958  | 0.9898820 | 0.9457523    | 0.9574100           |
|                                     | WRF_4fx4                | 0.0000486 | 0.0125345  | 0.9897867 | 0.9470969    | 0.9578386           |
|                                     | WRF_3fx4                | 0.0000678 | 0.0120302  | 0.9853302 | 0.9410619    | 0.9523916           |
|                                     | WRF_5fx3                | 0.0000509 | 0.0134955  | 0.9893829 | 0.9450131    | 0.9566665           |
| WS10 (m s <sup>-1</sup> )           | WRF_4fx3                | 0.0000515 | 0.0125355  | 0.9892875 | 0.9462982    | 0.9571850           |
|                                     | WRF_3fx3                | 0.0000692 | 0.0120402  | 0.9848379 | 0.9403619    | 0.9516387           |
|                                     | WRF_5fx5                | 0.0717551 | 22.79204   | 0.9779398 | 0.8997450    | 0.9211135           |
|                                     | WRF_4fx5                | 0.0726427 | 21.88501   | 0.9777967 | 0.8985056    | 0.9208920           |
|                                     | WRF_3fx5                | 0.1003181 | 18.21677   | 0.9678928 | 0.8853604    | 0.9100208           |
|                                     | WRF_5fx4                | 0.0717656 | 22.79304   | 0.9779393 | 0.8997451    | 0.9211132           |
|                                     | WRF_4fx4                | 0.0726502 | 21.88602   | 0.9777962 | 0.8985054    | 0.9208917           |
|                                     | WRF_3fx4                | 0.1003208 | 18.21657   | 0.9678922 | 0.8853602    | 0.9100215           |
| PSFC (Pa)                           | WRF_5fx3                | 0.0723285 | 22.77304   | 0.9778875 | 0.8997257    | 0.9210765           |
|                                     | WRF_4fx3                | 0.0731597 | 21.83602   | 0.9777444 | 0.8984851    | 0.9208500           |
|                                     | WRF_3fx3                | 0.1005638 | 18.21553   | 0.9678424 | 0.8853513    | 0.9099925           |
|                                     | WRF_5fx5                | 2.3953139 | 811.6875   | 0.9999967 | 0.9998835    | 0.9999513           |
|                                     | WRF_4fx5                | 2.4031211 | 877.7578   | 0.9999966 | 0.9998866    | 0.9999513           |
|                                     | WRF_3fx5                | 2.8537383 | 804.6641   | 0.9999966 | 0.9998521    | 0.9999504           |
|                                     | WRF_5fx4                | 13.063542 | 807.6875   | 0.9997818 | 0.9991977    | 0.9994573           |
|                                     | WRF_4fx4                | 13.068286 | 873.7578   | 0.9997816 | 0.9991989    | 0.9994567           |
| Precipitation (mm h <sup>-1</sup> ) | WRF_3fx4                | 13.184773 | 800.6641   | 0.9997793 | 0.9992093    | 0.9994533           |
|                                     | WRF_5fx3                | 127.81349 | 930.6406   | 0.9947367 | 0.9909427    | 0.9919432           |
|                                     | WRF_4fx3                | 127.81529 | 938.3750   | 0.9947364 | 0.9909418    | 0.9919378           |
|                                     | WRF_3fx3                | 127.82901 | 886.9766   | 0.9947321 | 0.9909020    | 0.9919389           |
|                                     | WRF_5fx5                | 0.0448970 | 130.5917   | 0.9815108 | 0.8783125    | 0.9301871           |
|                                     | WRF_4fx5                | 0.0450515 | 139.8071   | 0.9814382 | 0.8768666    | 0.9299014           |
|                                     | WRF_3fx5                | 0.0500592 | 145.4512   | 0.9781288 | 0.8695480    | 0.9271399           |
|                                     | WRF_5fx4                | 0.0501815 | 131.0017   | 0.9781844 | 0.8748295    | 0.9271685           |
|                                     | WRF_4fx4                | 0.0503287 | 139.807    | 0.9781112 | 0.8739549    | 0.9264433           |

|          |           |          |           |           |           |
|----------|-----------|----------|-----------|-----------|-----------|
| WRF_3fx4 | 0.0550365 | 145.4011 | 0.9748645 | 0.8666406 | 0.9233193 |
| WRF_5fx3 | 0.0829424 | 135.6245 | 0.9481691 | 0.7706791 | 0.8223788 |
| WRF_4fx3 | 0.0830692 | 140.207  | 0.9481080 | 0.7686988 | 0.8232154 |
| WRF_3fx3 | 0.0865763 | 144.8011 | 0.9455325 | 0.7724452 | 0.8195075 |

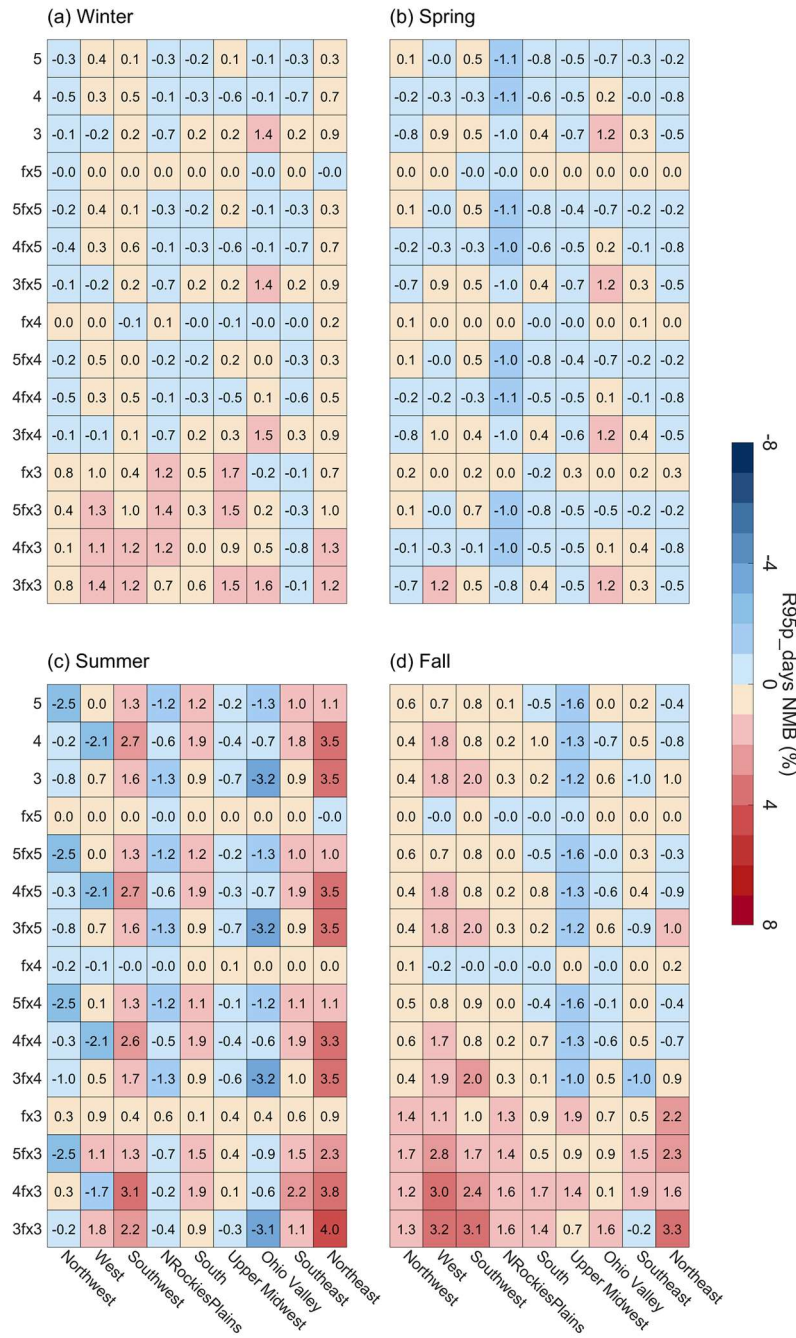

Figure S5: Seasonal and regional NMB of R95p\_days (a-d).

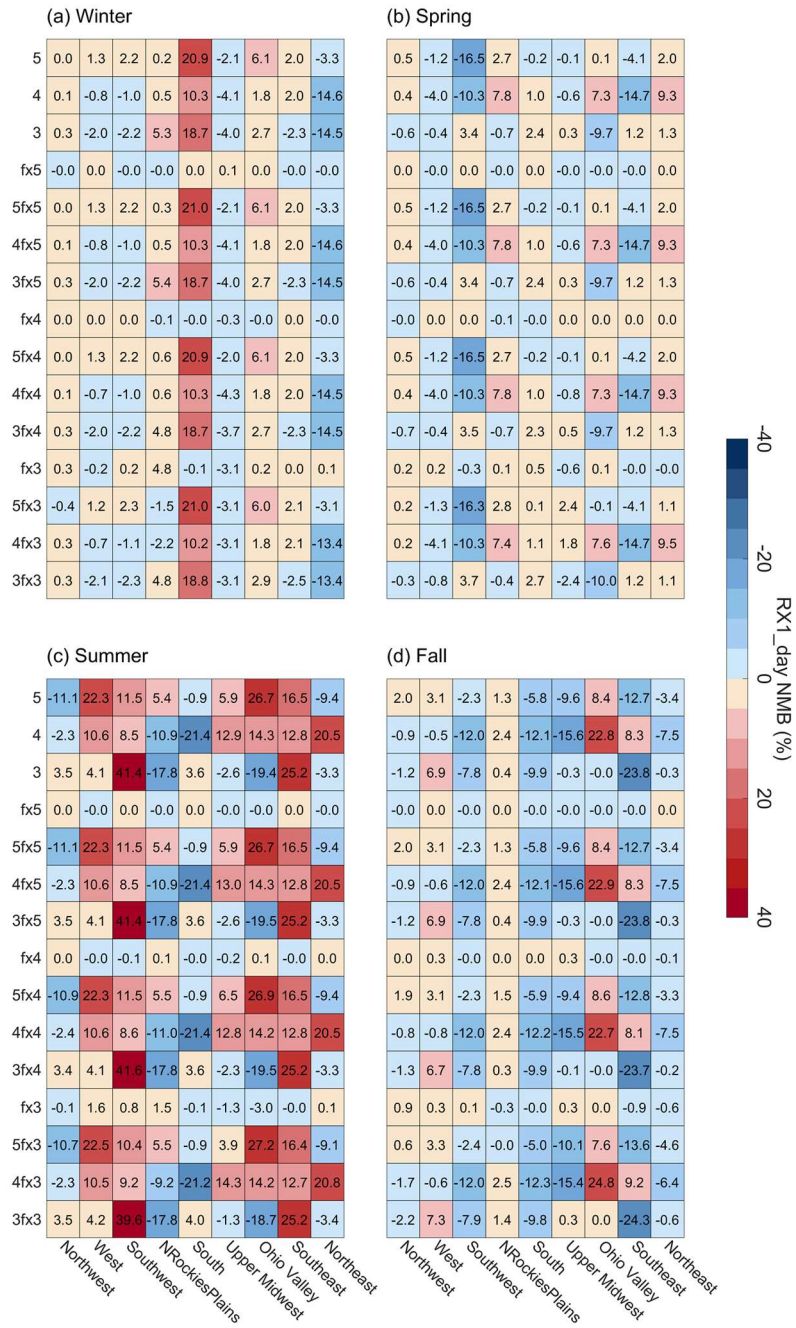

Figure S6: Seasonal and regional NMB of RX1\_day (a-d).

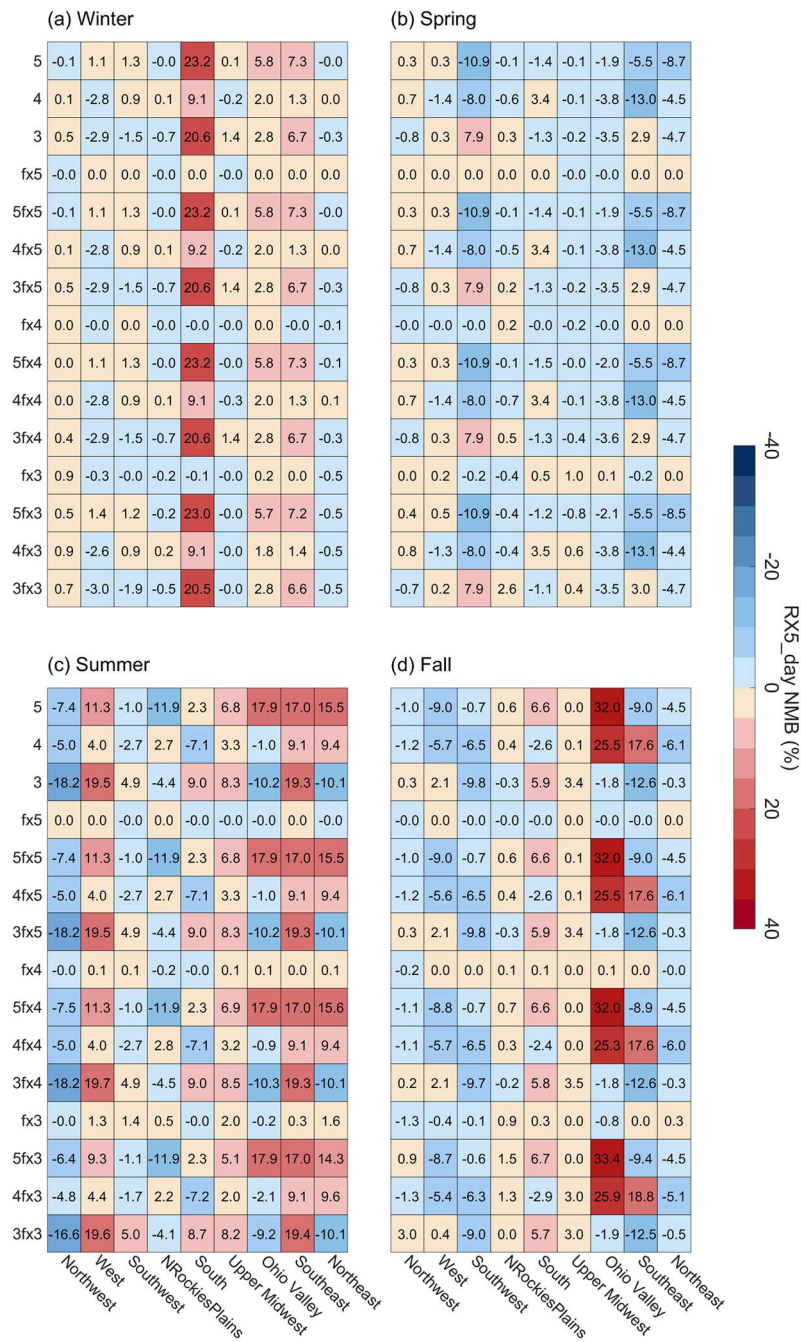

Figure S7: Seasonal and regional NMB of RX5\_day (a–d).

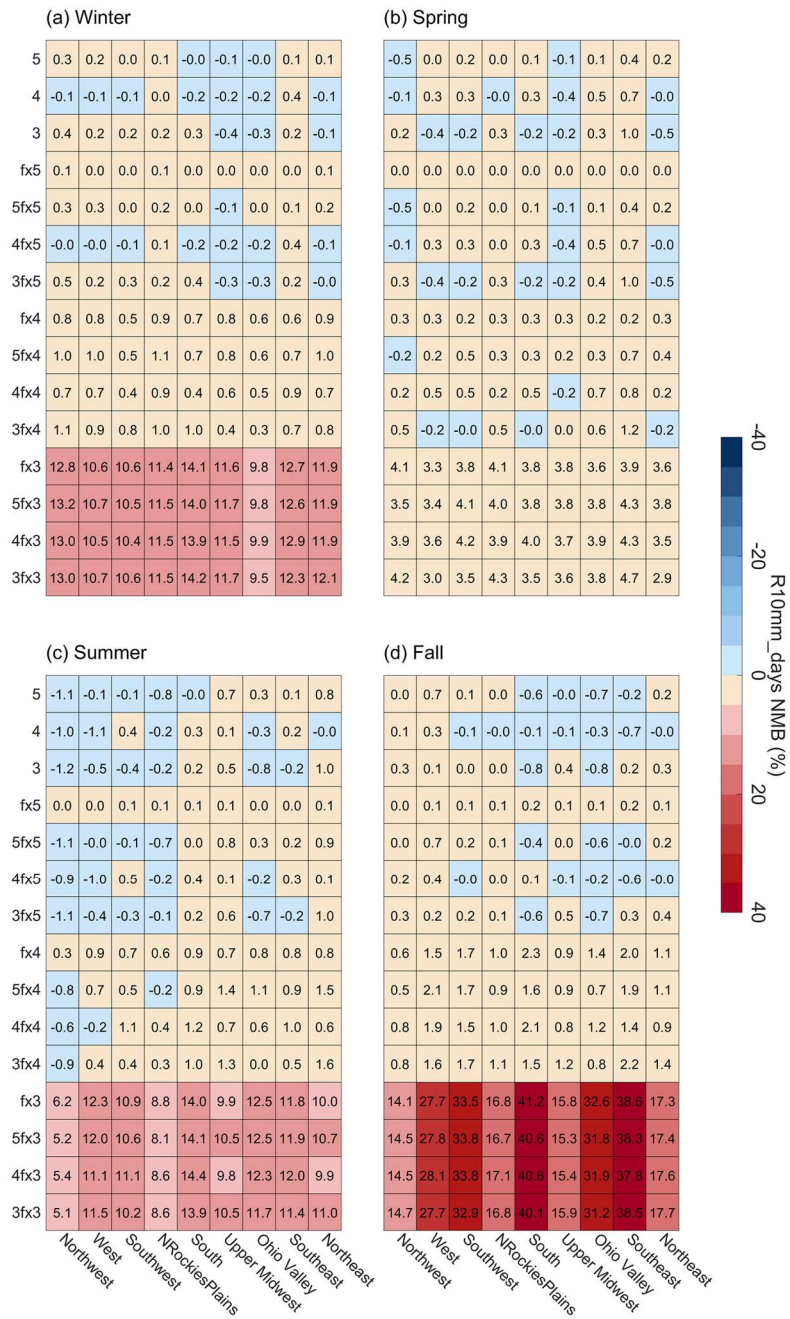

Figure S8: Seasonal and regional NMB of R10mm\_days (a-d).

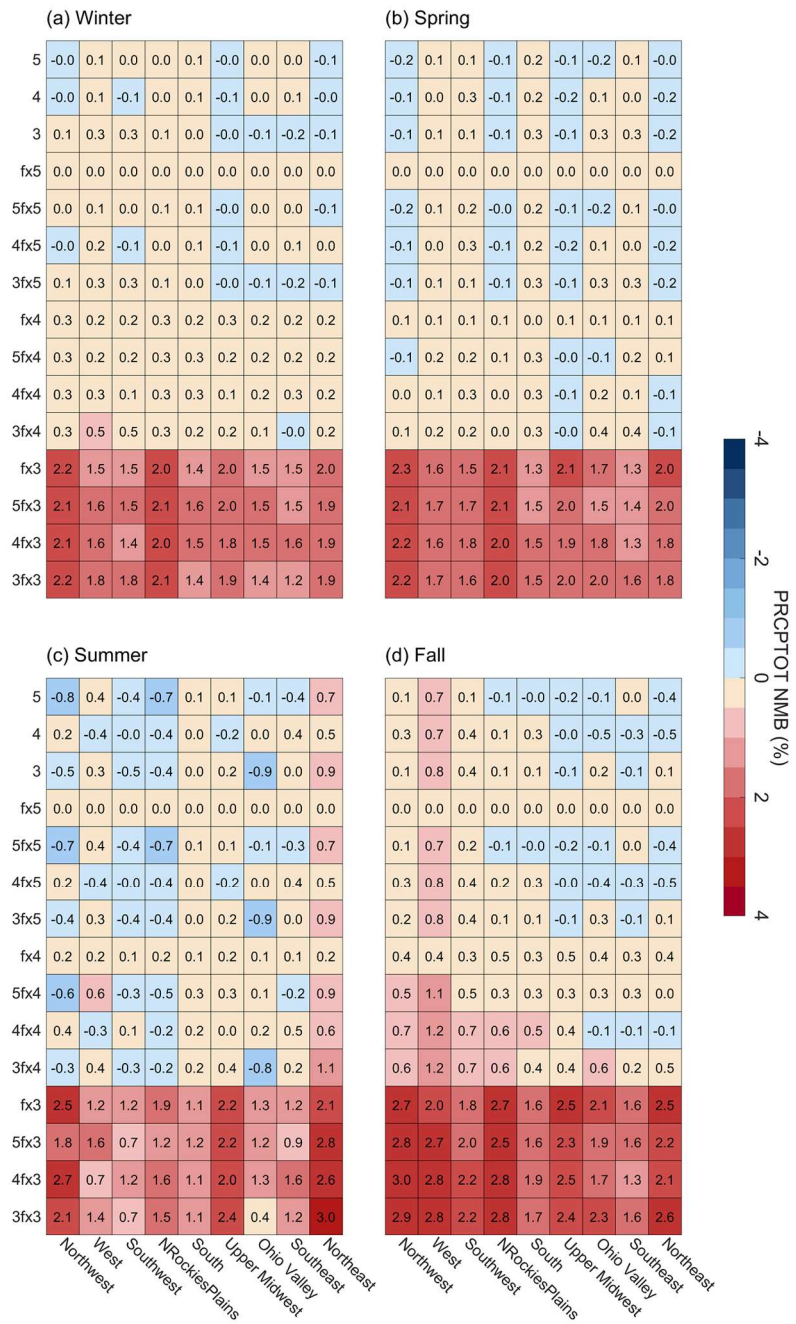

Figure S9: Seasonal and regional NMB of PRCPTOT (a–d).

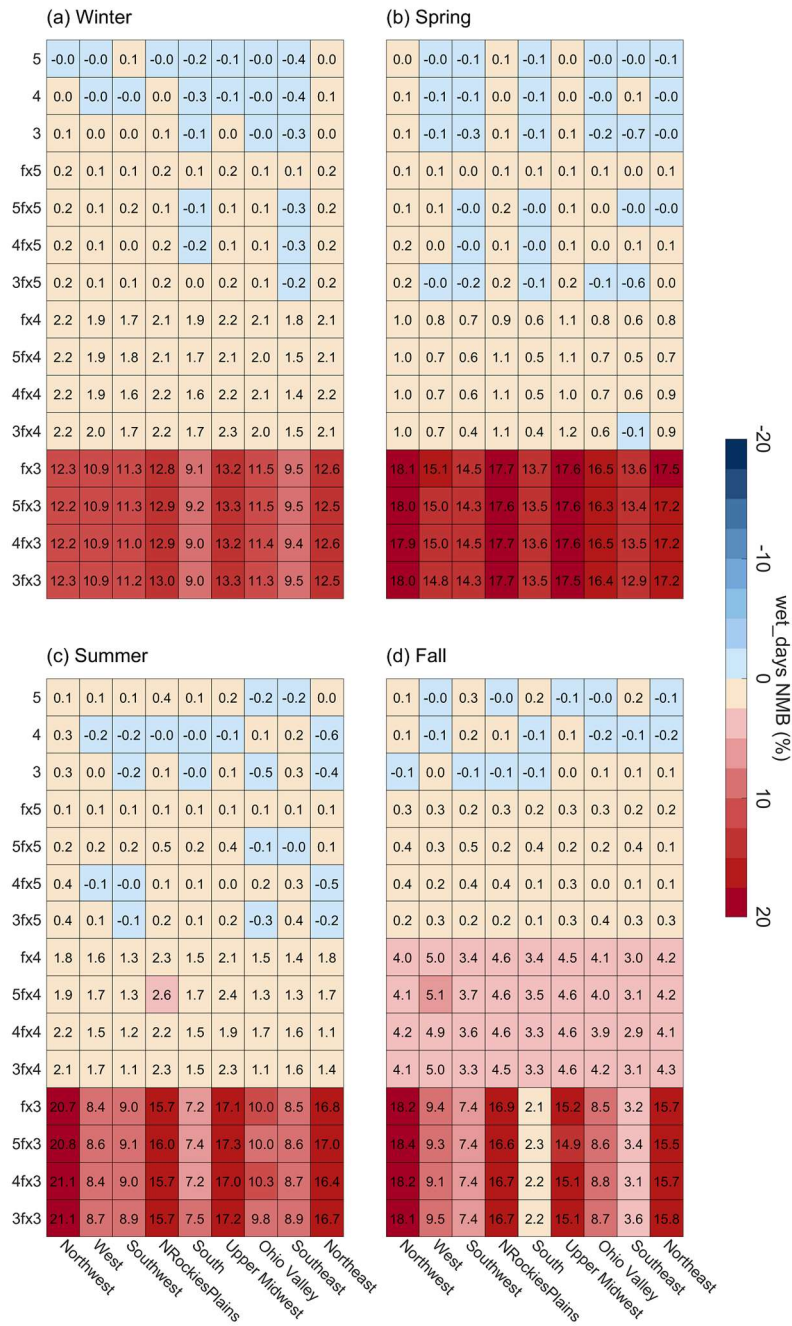

Figure S10: Seasonal and regional NMB of wet\_days (a-d).
